# Supplementary material for: A plastid phylogenomic framework for the palm family (Arecaceae)
Source: PubMed Central journal article supplement (PMC9993706; doi:10.1186/s12915-023-01544-y), 2023-03-08

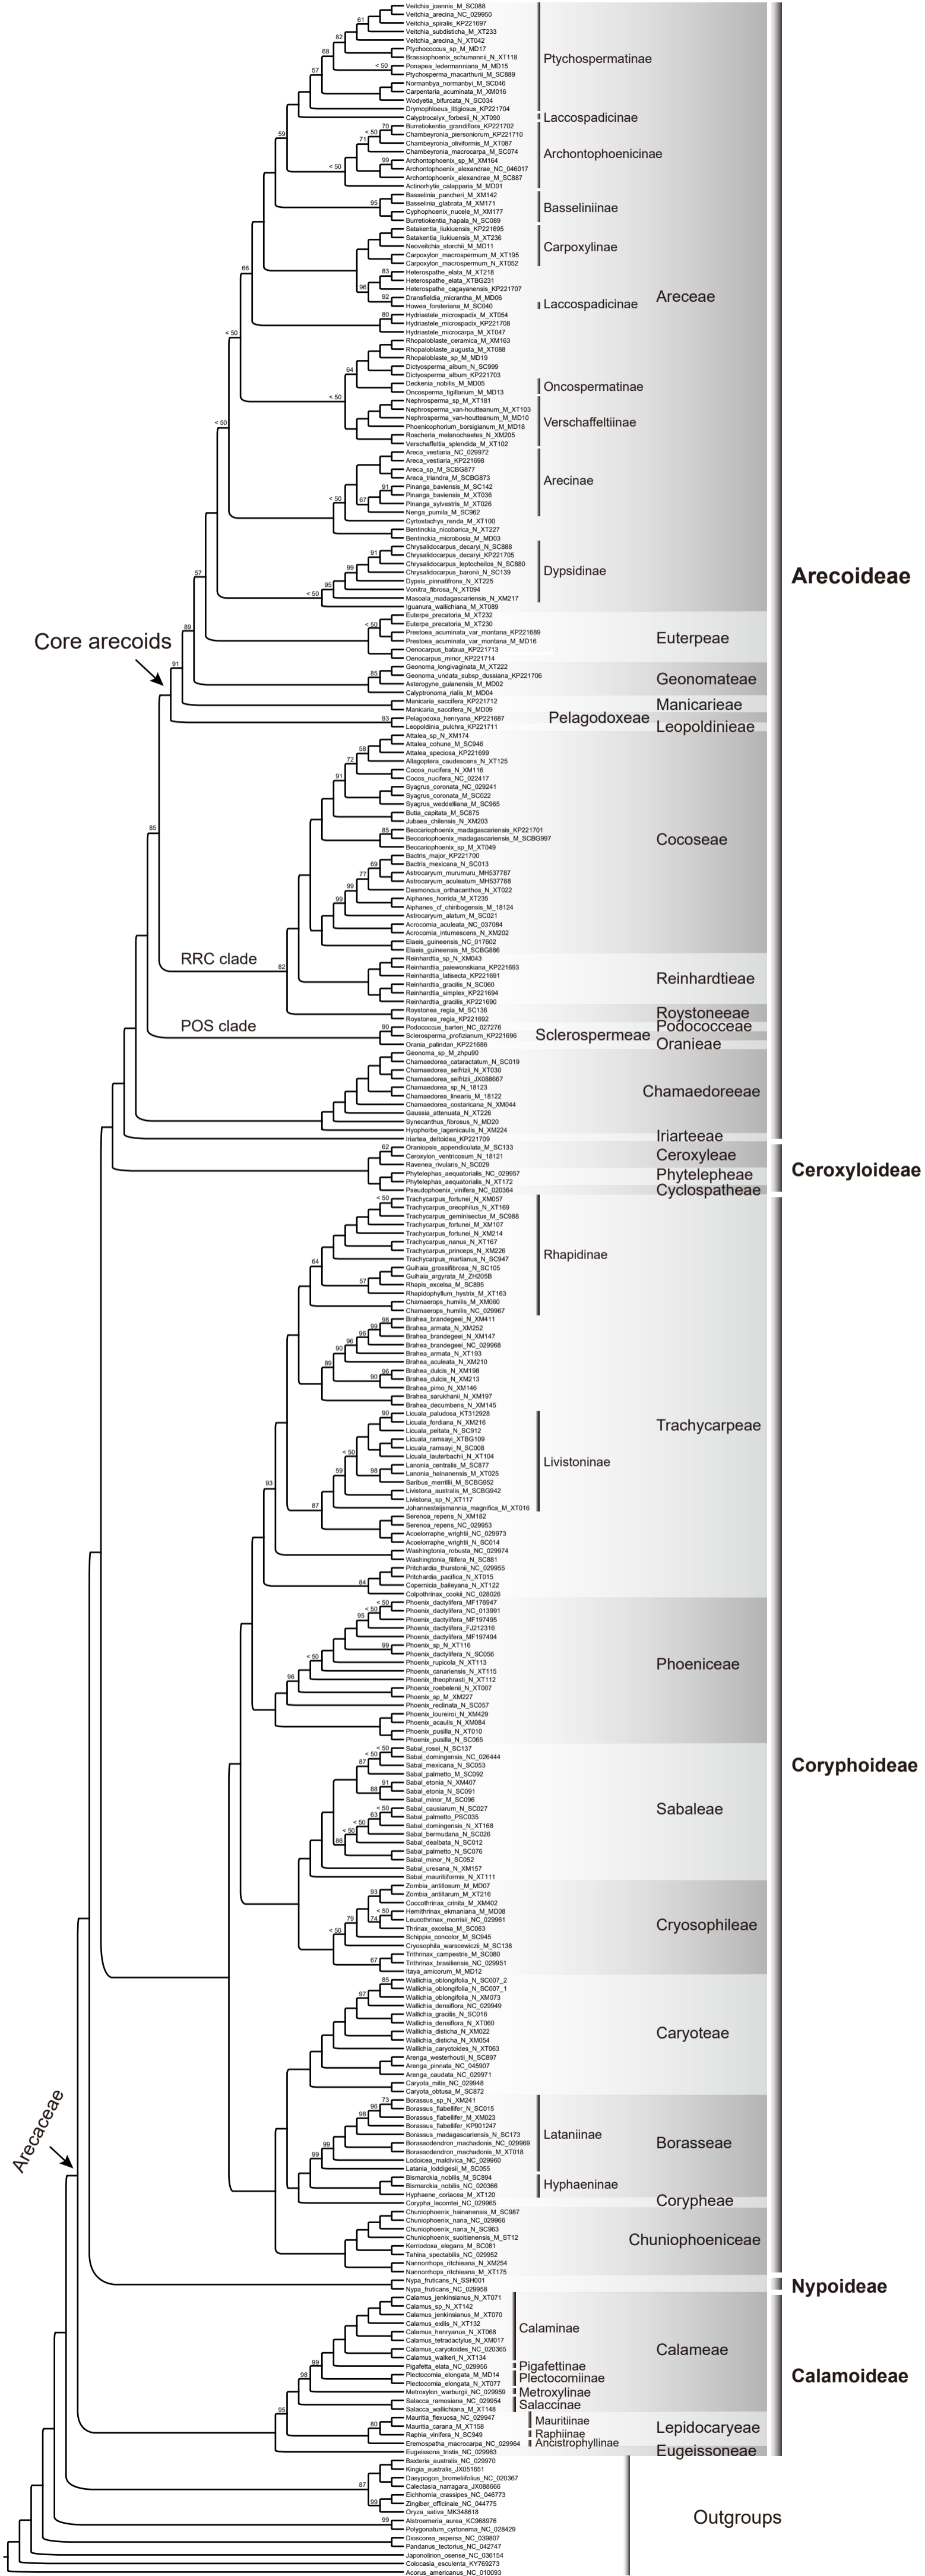

Supplement: 12915_2023_1544_MOESM4_ESM.pdf [file 12915_2023_1544_MOESM4_ESM.pdf]
